# Supplementary material for: Finding the most potent compounds using active learning on molecular pairs
Source: publisher site journal article supplement (doi:10.3762/bjoc.20.185), 2024-08-27
Supplement: Additional file 1 [file 1860-5397-20-185-S1.pdf]

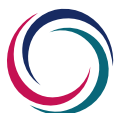

## Supporting Information

for

### Finding the most potent compounds using active learning on molecular pairs

Zachary Fralish and Daniel Reker

*Beilstein J. Org. Chem.* **2024**, *20*, 2152–2162. [doi:10.3762/bjoc.20.185](https://doi.org/10.3762/bjoc.20.185)

### Supplementary figures and tables

## Supplementary Figures

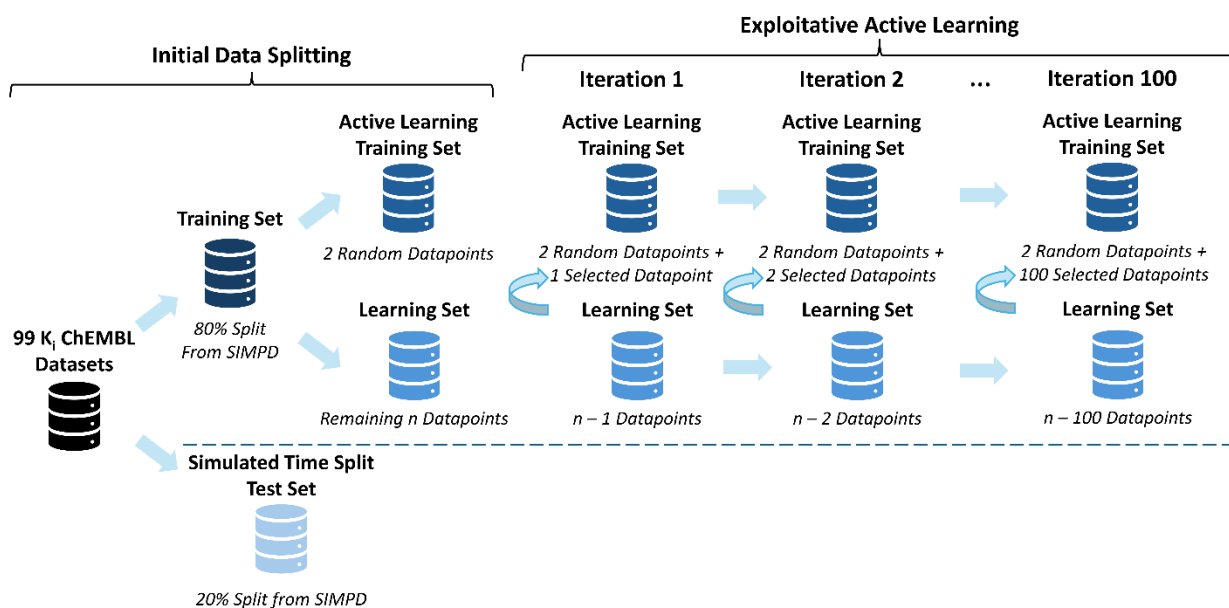

**Supplementary Figure S1: Dataset splitting.** Datasets were split into Training and Test Sets by the simulated medicinal chemistry project data (SIMPD) algorithm (Landrum et al. *Cheminform* 2023, 15, 119) to simulate time-based splits. Active Learning Training Sets were generated by selecting two random datapoints from the Training Sets. For ActiveDelta training, the Active Learning Training Set is then cross-merged to create all possible pairs of compounds within that set. For ActiveDelta prediction, the most potent datapoint from the Active Learning Training Set is cross-merged with the Learning Set. All other datapoints from the original Training Set were included into the initial Learning Set. During each iteration of active learning, one datapoint is selected by the model from the Learning Set to be added to the next iteration's Active Learning Training Set and removed from the next iteration's Learning Set.

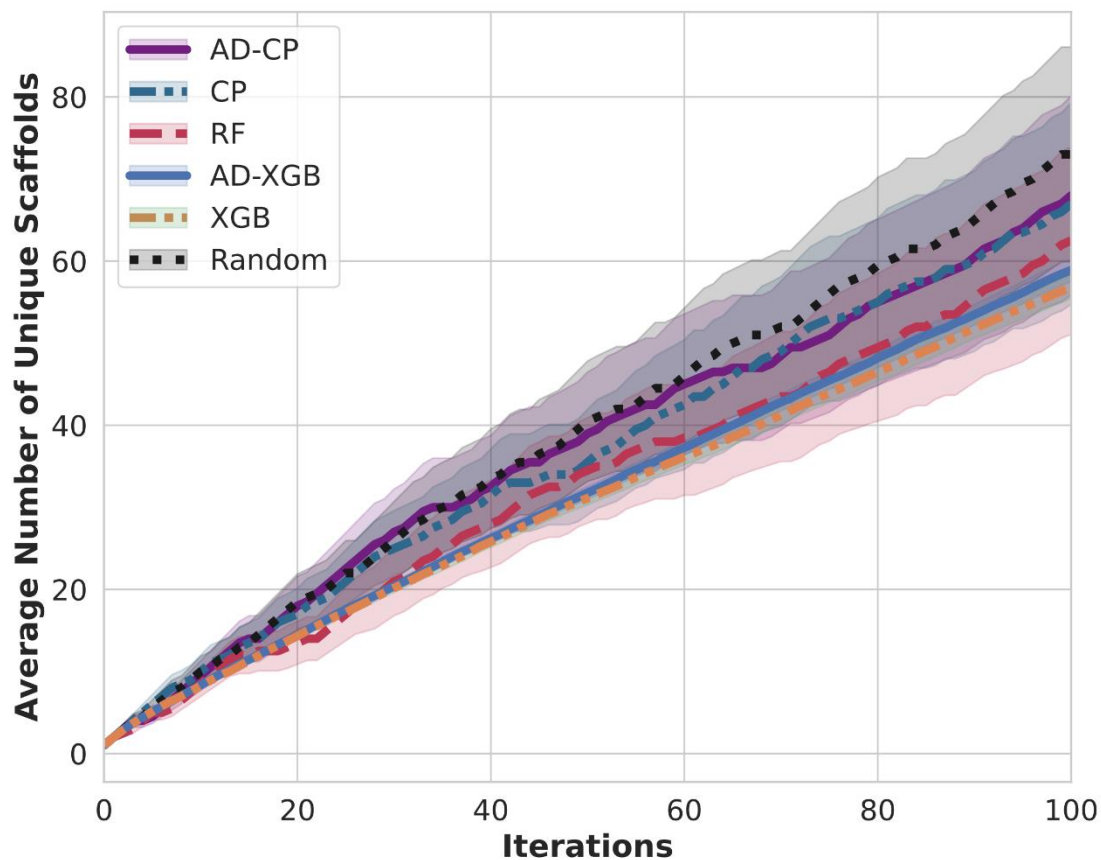

**Supplementary Figure S2:** Scaffold selection during exploitative active learning. The number of unique scaffolds selected by random selection (Random), Random Forest (RF), Chemprop (CP), ActiveDelta Chemprop (AD-CP), XGBoost (XGB), and ActiveDelta XGBoost (AD-XGB) is plotted over 100 iterations of active learning across 99 potency datasets after starting from two random datapoints for three repeats.

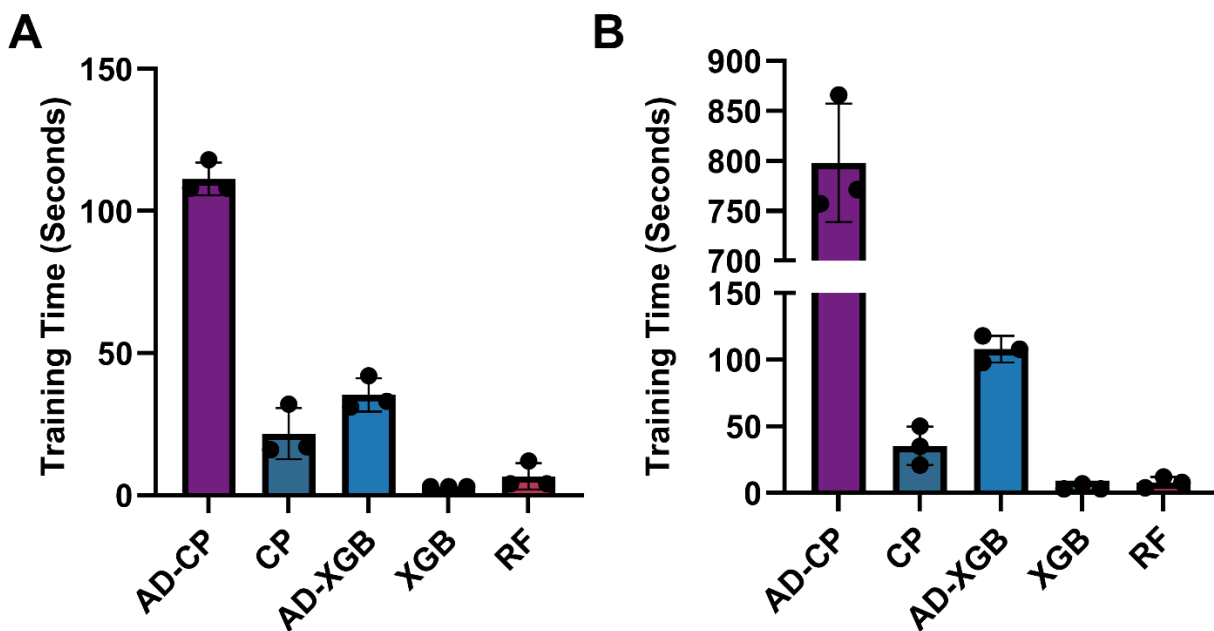

**Supplementary Figure S3:** Computational cost of model training. Model training time on **(A)** 100 datapoints and **(B)** 200 datapoints using an NVIDIA RTX A5000 GPU is presented in triplicates for all approaches (Random Forest (RF), Chemprop (CP), ActiveDelta Chemprop (AD-CP), XGBoost (XGB), and ActiveDelta XGBoost (AD-XGB)). Note that RF was not GPU-accelerated but was still run on the same GPU server using an Intel(R) Xeon(R) Gold 5317 CPU. At 100 training datapoints, AD-CP exhibited a 5.1-fold increase in computational cost over CP and AD-XGB exhibited a 11.8-fold increase over XGB. At 200 training datapoints, AD-CP exhibited a 22.6-fold increase over CP and AD-XGB exhibited a 24.9-fold increase over XGB.

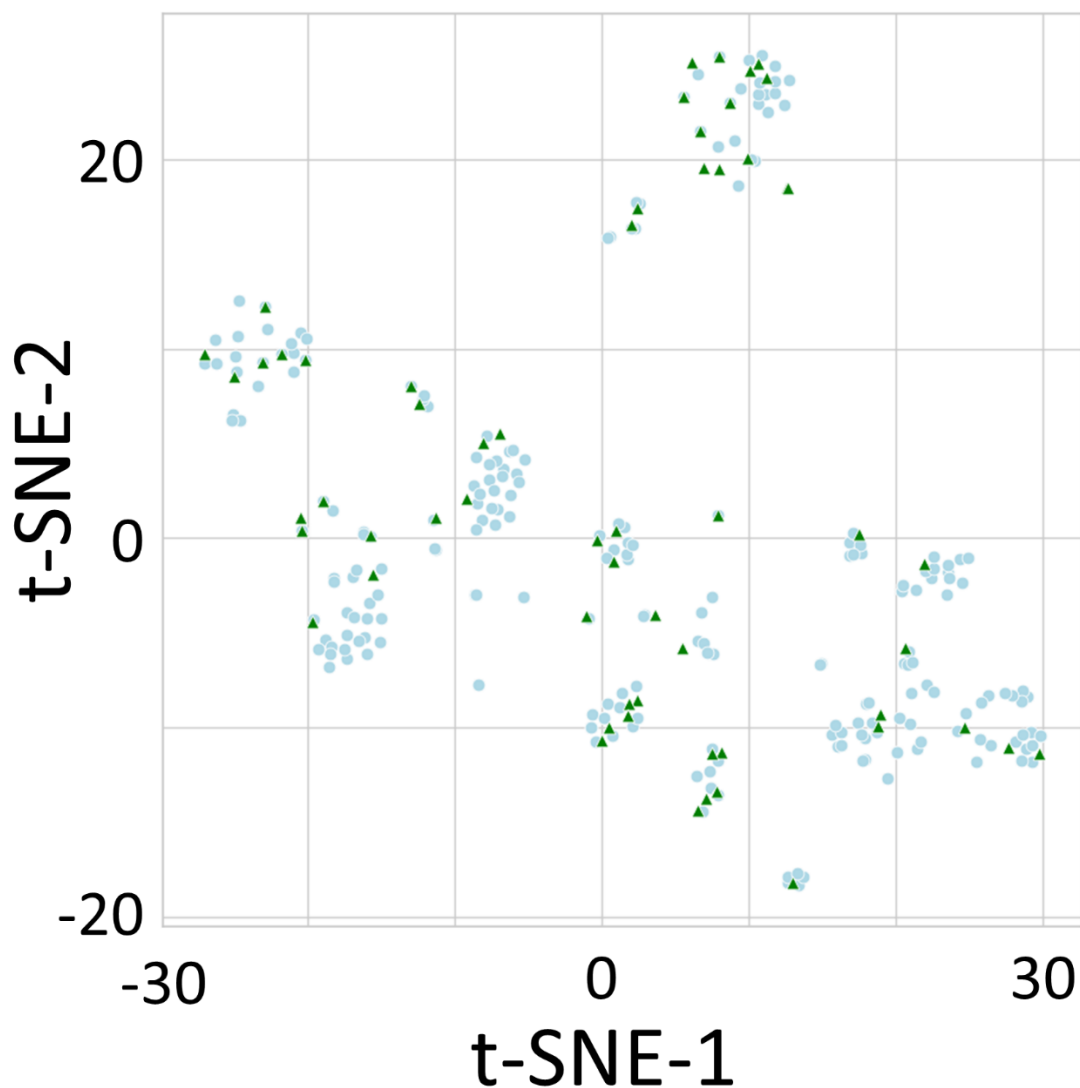

**Supplementary Figure S4:** T-SNE of training and test datapoints. Training datapoints are shown as blue circles and test datapoints are shown as green triangles for a representative dataset (ChEMBL232-1, Alpha-1b adrenergic receptor). Molecules were represented by radial chemical fingerprints (Morgan Fingerprint, radius 2, 2048 bits) and PCA was first performed to reduce the 2048 input dimensions to 50 dimensions before t-SNE was applied to further reduce these 50 dimensions to 2 dimensions

## Supplementary Tables

**Supplementary Table S1:** Percent of the top ten percentile most potent leads identified by random selection (Random), Random Forest (RF), Chemprop (CP), ActiveDelta Chemprop (AD-CP), XGBoost (XGB), and ActiveDelta XGBoost (AD-XGB) during active learning across 99  $K_i$  datasets for 200 iterations after starting from two random datapoints. Average and standard error of the mean (SEM) shown for three replicates.

| <i>Iteration</i> | <b>Random</b>   | <b>RF</b>       | <b>CP</b>       | <b>AD-CP</b>    | <b>XGB</b>      | <b>AD-XGB</b>   |
|------------------|-----------------|-----------------|-----------------|-----------------|-----------------|-----------------|
| 1                | 0.919<br>±0.165 | 0.982<br>±0.19  | 0.933<br>±0.162 | 0.922<br>±0.163 | 1.004<br>±0.175 | 1.03<br>±0.177  |
| 2                | 1.217<br>±0.197 | 1.529<br>±0.262 | 1.297<br>±0.22  | 1.135<br>±0.183 | 1.421<br>±0.217 | 1.283<br>±0.197 |
| 3                | 1.489<br>±0.218 | 2.053<br>±0.339 | 1.828<br>±0.28  | 1.408<br>±0.209 | 1.93<br>±0.273  | 1.882<br>±0.266 |
| 4                | 1.763<br>±0.23  | 2.585<br>±0.395 | 2.55<br>±0.357  | 1.63<br>±0.237  | 2.591<br>±0.335 | 2.41<br>±0.312  |
| 5                | 2.021<br>±0.251 | 3.13<br>±0.452  | 3.2<br>±0.423   | 1.868<br>±0.266 | 3.222<br>±0.397 | 3.17<br>±0.381  |
| 6                | 2.372<br>±0.267 | 3.823<br>±0.527 | 3.788<br>±0.48  | 2.125<br>±0.306 | 3.864<br>±0.453 | 3.914<br>±0.443 |
| 7                | 2.667<br>±0.28  | 4.423<br>±0.575 | 4.395<br>±0.544 | 2.501<br>±0.327 | 4.659<br>±0.521 | 4.63<br>±0.496  |
| 8                | 2.971<br>±0.289 | 5.123<br>±0.645 | 5.027<br>±0.613 | 2.804<br>±0.352 | 5.38<br>±0.575  | 5.377<br>±0.552 |
| 9                | 3.243<br>±0.316 | 5.766<br>±0.689 | 5.802<br>±0.682 | 3.1<br>±0.377   | 6.088<br>±0.644 | 6.093<br>±0.617 |
| 10               | 3.575<br>±0.328 | 6.463<br>±0.746 | 6.542<br>±0.762 | 3.372<br>±0.398 | 6.714<br>±0.69  | 6.832<br>±0.673 |
| 11               | 3.95<br>±0.354  | 7.155<br>±0.794 | 7.274<br>±0.837 | 3.753<br>±0.416 | 7.406<br>±0.741 | 7.382<br>±0.704 |
| 12               | 4.293<br>±0.371 | 7.816<br>±0.849 | 7.965<br>±0.895 | 4.169<br>±0.448 | 8.096<br>±0.77  | 8.046<br>±0.741 |
| 13               | 4.528<br>±0.381 | 8.581<br>±0.91  | 8.601<br>±0.954 | 4.593<br>±0.498 | 8.675<br>±0.796 | 8.777<br>±0.784 |

|    |                  |                  |                  |                  |                  |                  |
|----|------------------|------------------|------------------|------------------|------------------|------------------|
| 14 | 4.711<br>±0.383  | 9.319<br>±0.958  | 9.304<br>±1.005  | 5.07<br>±0.54    | 9.373<br>±0.83   | 9.581<br>±0.83   |
| 15 | 4.975<br>±0.394  | 9.976<br>±1.013  | 10.025<br>±1.058 | 5.507<br>±0.58   | 9.925<br>±0.865  | 10.287<br>±0.88  |
| 16 | 5.186<br>±0.401  | 10.58<br>±1.053  | 10.6<br>±1.093   | 5.993<br>±0.612  | 10.656<br>±0.901 | 10.996<br>±0.919 |
| 17 | 5.467<br>±0.419  | 11.363<br>±1.086 | 11.206<br>±1.125 | 6.554<br>±0.646  | 11.23<br>±0.946  | 11.795<br>±0.96  |
| 18 | 5.696<br>±0.427  | 12.034<br>±1.13  | 11.811<br>±1.175 | 7.165<br>±0.704  | 11.962<br>±0.983 | 12.525<br>±1.008 |
| 19 | 6.125<br>±0.446  | 12.776<br>±1.176 | 12.311<br>±1.212 | 7.81<br>±0.758   | 12.593<br>±1.031 | 13.305<br>±1.037 |
| 20 | 6.335<br>±0.456  | 13.431<br>±1.216 | 12.788<br>±1.236 | 8.379<br>±0.817  | 13.265<br>±1.072 | 14.158<br>±1.087 |
| 21 | 6.613<br>±0.46   | 14.226<br>±1.267 | 13.364<br>±1.268 | 9.046<br>±0.882  | 13.835<br>±1.113 | 14.879<br>±1.122 |
| 22 | 6.836<br>±0.472  | 14.877<br>±1.308 | 13.976<br>±1.298 | 9.67<br>±0.925   | 14.617<br>±1.157 | 15.614<br>±1.159 |
| 23 | 7.065<br>±0.481  | 15.486<br>±1.334 | 14.503<br>±1.328 | 10.403<br>±0.987 | 15.348<br>±1.186 | 16.231<br>±1.186 |
| 24 | 7.339<br>±0.488  | 16.179<br>±1.374 | 14.97<br>±1.343  | 11.067<br>±1.033 | 15.999<br>±1.224 | 16.895<br>±1.218 |
| 25 | 7.655<br>±0.508  | 16.884<br>±1.408 | 15.412<br>±1.368 | 11.836<br>±1.08  | 16.686<br>±1.256 | 17.595<br>±1.245 |
| 26 | 7.94<br>±0.522   | 17.532<br>±1.437 | 15.92<br>±1.398  | 12.661<br>±1.132 | 17.461<br>±1.294 | 18.152<br>±1.267 |
| 27 | 8.157<br>±0.53   | 18.184<br>±1.462 | 16.434<br>±1.43  | 13.59<br>±1.191  | 18.13<br>±1.322  | 18.894<br>±1.293 |
| 28 | 8.384<br>±0.537  | 18.873<br>±1.48  | 16.895<br>±1.452 | 14.398<br>±1.244 | 18.893<br>±1.353 | 19.72<br>±1.338  |
| 29 | 8.631<br>±0.553  | 19.627<br>±1.509 | 17.371<br>±1.475 | 15.327<br>±1.296 | 19.553<br>±1.382 | 20.398<br>±1.362 |
| 30 | 8.846<br>±0.559  | 20.285<br>±1.529 | 17.813<br>±1.5   | 16.199<br>±1.341 | 20.192<br>±1.412 | 21.186<br>±1.389 |
| 31 | 9.091<br>±0.561  | 20.915<br>±1.552 | 18.217<br>±1.526 | 17.002<br>±1.39  | 20.838<br>±1.447 | 21.893<br>±1.414 |
| 32 | 9.364<br>±0.562  | 21.542<br>±1.58  | 18.719<br>±1.548 | 17.822<br>±1.436 | 21.416<br>±1.474 | 22.581<br>±1.437 |
| 33 | 9.678<br>±0.575  | 22.11<br>±1.594  | 19.179<br>±1.586 | 18.597<br>±1.463 | 22.098<br>±1.502 | 23.337<br>±1.466 |
| 34 | 9.995<br>±0.582  | 22.737<br>±1.616 | 19.679<br>±1.6   | 19.426<br>±1.5   | 22.875<br>±1.534 | 23.91<br>±1.491  |
| 35 | 10.231<br>±0.585 | 23.326<br>±1.644 | 20.174<br>±1.618 | 20.257<br>±1.535 | 23.554<br>±1.553 | 24.588<br>±1.516 |

|    |                  |                  |                  |                  |                  |                  |
|----|------------------|------------------|------------------|------------------|------------------|------------------|
| 36 | 10.504<br>±0.599 | 24.019<br>±1.666 | 20.681<br>±1.649 | 21.017<br>±1.564 | 24.24<br>±1.568  | 25.326<br>±1.543 |
| 37 | 10.813<br>±0.613 | 24.601<br>±1.697 | 21.246<br>±1.68  | 21.858<br>±1.598 | 24.955<br>±1.593 | 26.033<br>±1.571 |
| 38 | 11.076<br>±0.631 | 25.133<br>±1.708 | 21.773<br>±1.701 | 22.706<br>±1.625 | 25.636<br>±1.609 | 26.705<br>±1.599 |
| 39 | 11.385<br>±0.643 | 25.689<br>±1.72  | 22.261<br>±1.711 | 23.532<br>±1.648 | 26.322<br>±1.627 | 27.392<br>±1.623 |
| 40 | 11.644<br>±0.645 | 26.374<br>±1.734 | 22.761<br>±1.721 | 24.342<br>±1.668 | 27.0<br>±1.65    | 28.332<br>±1.648 |
| 41 | 11.882<br>±0.659 | 27.016<br>±1.76  | 23.095<br>±1.732 | 25.169<br>±1.696 | 27.712<br>±1.672 | 28.881<br>±1.666 |
| 42 | 12.084<br>±0.668 | 27.637<br>±1.783 | 23.568<br>±1.751 | 26.014<br>±1.72  | 28.374<br>±1.687 | 29.494<br>±1.676 |
| 43 | 12.272<br>±0.673 | 28.226<br>±1.801 | 24.044<br>±1.765 | 26.785<br>±1.741 | 29.153<br>±1.712 | 30.165<br>±1.687 |
| 44 | 12.528<br>±0.684 | 28.897<br>±1.814 | 24.568<br>±1.794 | 27.622<br>±1.771 | 29.874<br>±1.732 | 30.781<br>±1.706 |
| 45 | 12.74<br>±0.688  | 29.404<br>±1.831 | 24.931<br>±1.809 | 28.432<br>±1.796 | 30.534<br>±1.758 | 31.462<br>±1.727 |
| 46 | 13.018<br>±0.695 | 29.881<br>±1.837 | 25.372<br>±1.827 | 29.035<br>±1.814 | 31.31<br>±1.786  | 32.029<br>±1.738 |
| 47 | 13.339<br>±0.712 | 30.561<br>±1.852 | 25.758<br>±1.832 | 29.741<br>±1.825 | 31.917<br>±1.792 | 32.653<br>±1.755 |
| 48 | 13.637<br>±0.717 | 31.157<br>±1.874 | 26.118<br>±1.847 | 30.395<br>±1.84  | 32.512<br>±1.797 | 33.363<br>±1.779 |
| 49 | 13.877<br>±0.723 | 31.793<br>±1.886 | 26.472<br>±1.847 | 30.989<br>±1.852 | 33.082<br>±1.809 | 34.121<br>±1.819 |
| 50 | 14.161<br>±0.73  | 32.399<br>±1.902 | 26.93<br>±1.855  | 31.669<br>±1.864 | 33.821<br>±1.825 | 34.739<br>±1.831 |
| 51 | 14.497<br>±0.735 | 32.904<br>±1.916 | 27.194<br>±1.858 | 32.366<br>±1.895 | 34.554<br>±1.843 | 35.363<br>±1.853 |
| 52 | 14.786<br>±0.752 | 33.471<br>±1.934 | 27.658<br>±1.862 | 33.124<br>±1.913 | 35.167<br>±1.852 | 35.922<br>±1.872 |
| 53 | 15.145<br>±0.769 | 33.977<br>±1.945 | 28.108<br>±1.858 | 33.895<br>±1.931 | 35.795<br>±1.869 | 36.566<br>±1.896 |
| 54 | 15.468<br>±0.776 | 34.531<br>±1.959 | 28.521<br>±1.864 | 34.565<br>±1.948 | 36.475<br>±1.878 | 37.149<br>±1.91  |
| 55 | 15.662<br>±0.779 | 35.025<br>±1.963 | 28.953<br>±1.869 | 35.126<br>±1.951 | 37.118<br>±1.902 | 37.78<br>±1.929  |
| 56 | 15.925<br>±0.79  | 35.631<br>±1.976 | 29.361<br>±1.87  | 35.897<br>±1.968 | 37.784<br>±1.918 | 38.549<br>±1.941 |
| 57 | 16.151<br>±0.792 | 36.187<br>±1.981 | 29.789<br>±1.88  | 36.698<br>±1.968 | 38.406<br>±1.926 | 39.226<br>±1.948 |



|    |                  |                  |                  |                  |                  |                  |
|----|------------------|------------------|------------------|------------------|------------------|------------------|
| 58 | 16.372<br>±0.806 | 36.862<br>±1.99  | 30.251<br>±1.886 | 37.456<br>±1.986 | 38.934<br>±1.935 | 39.904<br>±1.962 |
| 59 | 16.583<br>±0.807 | 37.512<br>±2.009 | 30.658<br>±1.889 | 38.05<br>±1.989  | 39.603<br>±1.952 | 40.543<br>±1.977 |
| 60 | 16.792<br>±0.802 | 37.991<br>±2.017 | 31.024<br>±1.891 | 38.821<br>±2.003 | 40.241<br>±1.976 | 41.291<br>±1.998 |
| 61 | 17.077<br>±0.803 | 38.513<br>±2.026 | 31.42<br>±1.905  | 39.593<br>±2.015 | 40.759<br>±1.996 | 42.067<br>±2.023 |
| 62 | 17.381<br>±0.808 | 39.085<br>±2.044 | 31.776<br>±1.905 | 40.23<br>±2.018  | 41.366<br>±2.012 | 42.823<br>±2.033 |
| 63 | 17.657<br>±0.817 | 39.736<br>±2.056 | 32.271<br>±1.91  | 41.053<br>±2.025 | 41.821<br>±2.026 | 43.48<br>±2.041  |
| 64 | 17.952<br>±0.825 | 40.311<br>±2.073 | 32.703<br>±1.911 | 41.708<br>±2.042 | 42.376<br>±2.035 | 44.101<br>±2.04  |
| 65 | 18.131<br>±0.826 | 40.831<br>±2.074 | 33.058<br>±1.921 | 42.364<br>±2.049 | 42.814<br>±2.041 | 44.783<br>±2.065 |
| 66 | 18.299<br>±0.831 | 41.368<br>±2.083 | 33.404<br>±1.929 | 43.142<br>±2.056 | 43.466<br>±2.044 | 45.373<br>±2.077 |
| 67 | 18.504<br>±0.834 | 41.977<br>±2.097 | 33.72<br>±1.931  | 43.861<br>±2.075 | 43.973<br>±2.04  | 45.985<br>±2.081 |
| 68 | 18.865<br>±0.843 | 42.455<br>±2.11  | 34.113<br>±1.932 | 44.361<br>±2.09  | 44.467<br>±2.046 | 46.592<br>±2.089 |
| 69 | 19.107<br>±0.847 | 42.936<br>±2.115 | 34.497<br>±1.945 | 44.936<br>±2.092 | 45.002<br>±2.054 | 47.147<br>±2.094 |
| 70 | 19.324<br>±0.847 | 43.468<br>±2.127 | 34.857<br>±1.964 | 45.626<br>±2.107 | 45.512<br>±2.062 | 47.761<br>±2.102 |
| 71 | 19.597<br>±0.857 | 43.92<br>±2.13   | 35.271<br>±1.968 | 46.179<br>±2.115 | 46.082<br>±2.071 | 48.348<br>±2.104 |
| 72 | 19.832<br>±0.871 | 44.413<br>±2.144 | 35.622<br>±1.979 | 46.723<br>±2.111 | 46.752<br>±2.085 | 48.938<br>±2.104 |
| 73 | 20.138<br>±0.881 | 44.955<br>±2.16  | 35.902<br>±1.977 | 47.293<br>±2.108 | 47.348<br>±2.093 | 49.497<br>±2.105 |
| 74 | 20.41<br>±0.888  | 45.504<br>±2.176 | 36.314<br>±1.996 | 47.858<br>±2.106 | 47.99<br>±2.11   | 50.087<br>±2.109 |
| 75 | 20.692<br>±0.902 | 45.991<br>±2.181 | 36.709<br>±2.003 | 48.537<br>±2.12  | 48.481<br>±2.128 | 50.598<br>±2.106 |
| 76 | 21.09<br>±0.92   | 46.437<br>±2.185 | 37.061<br>±2.006 | 49.038<br>±2.111 | 48.962<br>±2.135 | 51.029<br>±2.1   |
| 77 | 21.364<br>±0.926 | 46.829<br>±2.191 | 37.404<br>±2.012 | 49.606<br>±2.105 | 49.441<br>±2.154 | 51.522<br>±2.1   |
| 78 | 21.645<br>±0.92  | 47.323<br>±2.192 | 37.725<br>±2.025 | 50.206<br>±2.104 | 49.916<br>±2.164 | 51.897<br>±2.105 |
| 79 | 21.977<br>±0.924 | 47.734<br>±2.192 | 38.002<br>±2.033 | 50.723<br>±2.113 | 50.308<br>±2.168 | 52.346<br>±2.106 |

|     |                  |                  |                  |                  |                  |                  |
|-----|------------------|------------------|------------------|------------------|------------------|------------------|
| 80  | 22.299<br>±0.936 | 48.254<br>±2.199 | 38.354<br>±2.04  | 51.216<br>±2.111 | 50.773<br>±2.182 | 52.863<br>±2.112 |
| 81  | 22.521<br>±0.94  | 48.742<br>±2.201 | 38.735<br>±2.055 | 51.738<br>±2.108 | 51.198<br>±2.183 | 53.394<br>±2.119 |
| 82  | 22.803<br>±0.964 | 49.237<br>±2.212 | 39.04<br>±2.066  | 52.196<br>±2.1   | 51.754<br>±2.184 | 53.905<br>±2.121 |
| 83  | 23.067<br>±0.984 | 49.678<br>±2.224 | 39.333<br>±2.071 | 52.68<br>±2.097  | 52.239<br>±2.19  | 54.32<br>±2.117  |
| 84  | 23.343<br>±0.991 | 50.151<br>±2.22  | 39.699<br>±2.086 | 53.131<br>±2.096 | 52.658<br>±2.189 | 54.814<br>±2.111 |
| 85  | 23.673<br>±1.011 | 50.491<br>±2.222 | 39.943<br>±2.089 | 53.641<br>±2.097 | 53.061<br>±2.191 | 55.226<br>±2.112 |
| 86  | 23.874<br>±1.017 | 50.88<br>±2.22   | 40.356<br>±2.101 | 54.244<br>±2.108 | 53.596<br>±2.192 | 55.602<br>±2.115 |
| 87  | 24.216<br>±1.034 | 51.267<br>±2.218 | 40.646<br>±2.114 | 54.752<br>±2.109 | 53.988<br>±2.193 | 56.08<br>±2.121  |
| 88  | 24.474<br>±1.039 | 51.601<br>±2.22  | 40.972<br>±2.121 | 55.187<br>±2.104 | 54.45<br>±2.195  | 56.557<br>±2.114 |
| 89  | 24.753<br>±1.045 | 51.962<br>±2.21  | 41.339<br>±2.135 | 55.731<br>±2.097 | 54.858<br>±2.201 | 57.081<br>±2.111 |
| 90  | 25.014<br>±1.047 | 52.349<br>±2.214 | 41.611<br>±2.135 | 56.322<br>±2.1   | 55.207<br>±2.2   | 57.577<br>±2.107 |
| 91  | 25.36<br>±1.061  | 52.758<br>±2.203 | 41.935<br>±2.14  | 56.799<br>±2.089 | 55.499<br>±2.202 | 58.011<br>±2.098 |
| 92  | 25.597<br>±1.063 | 53.259<br>±2.199 | 42.206<br>±2.149 | 57.241<br>±2.081 | 55.91<br>±2.194  | 58.521<br>±2.092 |
| 93  | 25.782<br>±1.064 | 53.64<br>±2.195  | 42.582<br>±2.152 | 57.788<br>±2.075 | 56.243<br>±2.193 | 58.952<br>±2.086 |
| 94  | 26.134<br>±1.073 | 54.042<br>±2.199 | 42.887<br>±2.159 | 58.217<br>±2.066 | 56.661<br>±2.179 | 59.484<br>±2.08  |
| 95  | 26.394<br>±1.078 | 54.372<br>±2.201 | 43.219<br>±2.162 | 58.588<br>±2.062 | 57.19<br>±2.175  | 59.905<br>±2.071 |
| 96  | 26.663<br>±1.088 | 54.725<br>±2.203 | 43.501<br>±2.165 | 59.044<br>±2.06  | 57.535<br>±2.169 | 60.353<br>±2.064 |
| 97  | 27.007<br>±1.103 | 55.133<br>±2.204 | 43.875<br>±2.184 | 59.467<br>±2.057 | 58.009<br>±2.168 | 60.773<br>±2.064 |
| 98  | 27.381<br>±1.127 | 55.594<br>±2.207 | 44.098<br>±2.189 | 59.841<br>±2.049 | 58.43<br>±2.167  | 61.16<br>±2.052  |
| 99  | 27.629<br>±1.131 | 55.986<br>±2.208 | 44.662<br>±2.202 | 60.342<br>±2.043 | 58.803<br>±2.151 | 61.621<br>±2.04  |
| 100 | 27.939<br>±1.141 | 56.329<br>±2.205 | 45.031<br>±2.207 | 60.812<br>±2.041 | 59.185<br>±2.147 | 62.055<br>±2.037 |
| 101 | 28.168<br>±1.143 | 56.648<br>±2.204 | 45.475<br>±2.202 | 61.307<br>±2.037 | 59.492<br>±2.144 | 62.494<br>±2.035 |

|     |                  |                  |                  |                  |                  |                  |
|-----|------------------|------------------|------------------|------------------|------------------|------------------|
| 102 | 28.475<br>±1.144 | 57.06<br>±2.204  | 45.905<br>±2.199 | 61.776<br>±2.036 | 59.895<br>±2.136 | 62.885<br>±2.024 |
| 103 | 28.738<br>±1.144 | 57.438<br>±2.213 | 46.474<br>±2.211 | 62.171<br>±2.029 | 60.258<br>±2.133 | 63.261<br>±2.015 |
| 104 | 29.052<br>±1.16  | 57.791<br>±2.222 | 47.063<br>±2.224 | 62.542<br>±2.02  | 60.65<br>±2.133  | 63.681<br>±2.001 |
| 105 | 29.295<br>±1.173 | 58.106<br>±2.228 | 47.518<br>±2.228 | 63.007<br>±2.017 | 61.087<br>±2.131 | 64.088<br>±1.997 |
| 106 | 29.494<br>±1.178 | 58.47<br>±2.239  | 48.043<br>±2.235 | 63.471<br>±2.007 | 61.487<br>±2.133 | 64.461<br>±1.998 |
| 107 | 29.655<br>±1.179 | 58.904<br>±2.241 | 48.509<br>±2.227 | 63.858<br>±2.003 | 61.801<br>±2.121 | 64.866<br>±1.994 |
| 108 | 29.875<br>±1.183 | 59.182<br>±2.237 | 48.892<br>±2.219 | 64.359<br>±1.989 | 62.173<br>±2.115 | 65.233<br>±1.993 |
| 109 | 30.128<br>±1.183 | 59.56<br>±2.243  | 49.257<br>±2.227 | 64.807<br>±1.975 | 62.573<br>±2.108 | 65.539<br>±1.992 |
| 110 | 30.478<br>±1.193 | 59.838<br>±2.241 | 49.657<br>±2.232 | 65.172<br>±1.964 | 62.926<br>±2.099 | 65.895<br>±1.998 |
| 111 | 30.734<br>±1.187 | 60.162<br>±2.236 | 50.007<br>±2.234 | 65.468<br>±1.947 | 63.332<br>±2.099 | 66.148<br>±1.994 |
| 112 | 31.035<br>±1.193 | 60.539<br>±2.232 | 50.422<br>±2.235 | 65.909<br>±1.942 | 63.652<br>±2.084 | 66.492<br>±1.98  |
| 113 | 31.265<br>±1.201 | 60.879<br>±2.228 | 50.83<br>±2.235  | 66.39<br>±1.942  | 63.941<br>±2.077 | 66.796<br>±1.978 |
| 114 | 31.541<br>±1.21  | 61.207<br>±2.227 | 51.333<br>±2.248 | 66.845<br>±1.935 | 64.35<br>±2.074  | 67.126<br>±1.972 |
| 115 | 31.876<br>±1.214 | 61.54<br>±2.225  | 51.86<br>±2.247  | 67.286<br>±1.921 | 64.668<br>±2.069 | 67.444<br>±1.971 |
| 116 | 32.212<br>±1.222 | 61.915<br>±2.232 | 52.219<br>±2.254 | 67.726<br>±1.91  | 65.031<br>±2.062 | 67.741<br>±1.962 |
| 117 | 32.464<br>±1.236 | 62.331<br>±2.228 | 52.682<br>±2.252 | 68.151<br>±1.911 | 65.397<br>±2.054 | 68.068<br>±1.961 |
| 118 | 32.659<br>±1.243 | 62.66<br>±2.228  | 53.082<br>±2.252 | 68.464<br>±1.903 | 65.67<br>±2.048  | 68.38<br>±1.955  |
| 119 | 32.964<br>±1.257 | 62.978<br>±2.23  | 53.477<br>±2.261 | 68.786<br>±1.897 | 66.008<br>±2.039 | 68.682<br>±1.949 |
| 120 | 33.214<br>±1.259 | 63.405<br>±2.237 | 53.814<br>±2.253 | 69.093<br>±1.884 | 66.354<br>±2.037 | 69.105<br>±1.954 |
| 121 | 33.48<br>±1.262  | 63.71<br>±2.238  | 54.224<br>±2.244 | 69.34<br>±1.879  | 66.77<br>±2.032  | 69.422<br>±1.95  |
| 122 | 33.72<br>±1.272  | 64.115<br>±2.233 | 54.708<br>±2.244 | 69.588<br>±1.875 | 67.032<br>±2.024 | 69.756<br>±1.941 |
| 123 | 33.986<br>±1.277 | 64.402<br>±2.228 | 55.02<br>±2.25   | 69.901<br>±1.867 | 67.308<br>±2.015 | 70.085<br>±1.939 |

|     |                  |                  |                  |                  |                  |                  |
|-----|------------------|------------------|------------------|------------------|------------------|------------------|
| 124 | 34.235<br>±1.276 | 64.777<br>±2.234 | 55.355<br>±2.261 | 70.144<br>±1.857 | 67.668<br>±2.004 | 70.515<br>±1.938 |
| 125 | 34.49<br>±1.276  | 65.202<br>±2.234 | 55.813<br>±2.264 | 70.384<br>±1.841 | 68.023<br>±1.995 | 70.913<br>±1.935 |
| 126 | 34.78<br>±1.283  | 65.606<br>±2.234 | 56.188<br>±2.266 | 70.718<br>±1.827 | 68.335<br>±1.985 | 71.298<br>±1.932 |
| 127 | 35.072<br>±1.291 | 65.993<br>±2.236 | 56.499<br>±2.261 | 71.035<br>±1.812 | 68.661<br>±1.977 | 71.671<br>±1.924 |
| 128 | 35.254<br>±1.286 | 66.399<br>±2.23  | 56.901<br>±2.259 | 71.369<br>±1.807 | 69.047<br>±1.965 | 71.971<br>±1.919 |
| 129 | 35.621<br>±1.296 | 66.881<br>±2.225 | 57.223<br>±2.263 | 71.715<br>±1.788 | 69.402<br>±1.961 | 72.381<br>±1.912 |
| 130 | 35.855<br>±1.304 | 67.311<br>±2.22  | 57.54<br>±2.256  | 72.113<br>±1.771 | 69.821<br>±1.955 | 72.722<br>±1.907 |
| 131 | 36.192<br>±1.315 | 67.601<br>±2.219 | 57.868<br>±2.259 | 72.442<br>±1.757 | 70.052<br>±1.944 | 73.101<br>±1.904 |
| 132 | 36.41<br>±1.32   | 68.003<br>±2.214 | 58.193<br>±2.252 | 72.781<br>±1.746 | 70.494<br>±1.938 | 73.436<br>±1.897 |
| 133 | 36.688<br>±1.335 | 68.329<br>±2.214 | 58.556<br>±2.256 | 73.033<br>±1.733 | 70.897<br>±1.939 | 73.838<br>±1.888 |
| 134 | 36.943<br>±1.334 | 68.662<br>±2.209 | 59.006<br>±2.263 | 73.375<br>±1.721 | 71.25<br>±1.933  | 74.197<br>±1.882 |
| 135 | 37.2<br>±1.345   | 69.026<br>±2.207 | 59.356<br>±2.256 | 73.675<br>±1.71  | 71.551<br>±1.928 | 74.513<br>±1.877 |
| 136 | 37.48<br>±1.354  | 69.322<br>±2.204 | 59.684<br>±2.248 | 74.104<br>±1.7   | 71.822<br>±1.922 | 74.79<br>±1.871  |
| 137 | 37.756<br>±1.364 | 69.687<br>±2.202 | 60.09<br>±2.249  | 74.397<br>±1.687 | 72.11<br>±1.921  | 75.062<br>±1.872 |
| 138 | 37.934<br>±1.364 | 69.974<br>±2.202 | 60.453<br>±2.24  | 74.695<br>±1.673 | 72.449<br>±1.92  | 75.348<br>±1.867 |
| 139 | 38.184<br>±1.369 | 70.292<br>±2.195 | 60.789<br>±2.253 | 74.954<br>±1.661 | 72.743<br>±1.92  | 75.647<br>±1.859 |
| 140 | 38.496<br>±1.376 | 70.638<br>±2.186 | 61.141<br>±2.255 | 75.256<br>±1.653 | 73.053<br>±1.916 | 75.987<br>±1.85  |
| 141 | 38.768<br>±1.387 | 70.923<br>±2.184 | 61.453<br>±2.255 | 75.515<br>±1.647 | 73.389<br>±1.912 | 76.197<br>±1.844 |
| 142 | 39.122<br>±1.404 | 71.163<br>±2.176 | 61.747<br>±2.26  | 75.775<br>±1.645 | 73.621<br>±1.9   | 76.452<br>±1.839 |
| 143 | 39.381<br>±1.411 | 71.424<br>±2.174 | 62.101<br>±2.256 | 76.085<br>±1.641 | 73.904<br>±1.892 | 76.739<br>±1.83  |
| 144 | 39.623<br>±1.417 | 71.682<br>±2.166 | 62.396<br>±2.255 | 76.385<br>±1.636 | 74.139<br>±1.884 | 77.095<br>±1.823 |
| 145 | 39.832<br>±1.42  | 71.914<br>±2.163 | 62.766<br>±2.257 | 76.689<br>±1.63  | 74.406<br>±1.882 | 77.399<br>±1.81  |

|     |                  |                  |                  |                  |                  |                  |
|-----|------------------|------------------|------------------|------------------|------------------|------------------|
| 146 | 40.126<br>±1.433 | 72.169<br>±2.159 | 62.994<br>±2.261 | 76.992<br>±1.625 | 74.632<br>±1.88  | 77.666<br>±1.802 |
| 147 | 40.419<br>±1.442 | 72.536<br>±2.153 | 63.315<br>±2.266 | 77.261<br>±1.624 | 74.928<br>±1.875 | 77.932<br>±1.793 |
| 148 | 40.678<br>±1.453 | 72.813<br>±2.152 | 63.625<br>±2.265 | 77.519<br>±1.617 | 75.221<br>±1.871 | 78.184<br>±1.787 |
| 149 | 40.952<br>±1.465 | 72.985<br>±2.144 | 64.026<br>±2.267 | 77.775<br>±1.611 | 75.506<br>±1.87  | 78.484<br>±1.779 |
| 150 | 41.258<br>±1.474 | 73.35<br>±2.137  | 64.395<br>±2.268 | 78.054<br>±1.614 | 75.732<br>±1.868 | 78.746<br>±1.778 |
| 151 | 41.6<br>±1.485   | 73.627<br>±2.124 | 64.766<br>±2.266 | 78.272<br>±1.606 | 75.93<br>±1.859  | 78.956<br>±1.771 |
| 152 | 41.887<br>±1.497 | 73.951<br>±2.115 | 65.1<br>±2.267   | 78.531<br>±1.601 | 76.163<br>±1.853 | 79.133<br>±1.761 |
| 153 | 42.151<br>±1.498 | 74.283<br>±2.103 | 65.494<br>±2.26  | 78.81<br>±1.6    | 76.384<br>±1.853 | 79.503<br>±1.759 |
| 154 | 42.347<br>±1.502 | 74.567<br>±2.099 | 65.838<br>±2.261 | 79.045<br>±1.597 | 76.627<br>±1.851 | 79.788<br>±1.752 |
| 155 | 42.629<br>±1.512 | 74.879<br>±2.092 | 66.324<br>±2.257 | 79.238<br>±1.593 | 76.83<br>±1.847  | 80.014<br>±1.746 |
| 156 | 42.842<br>±1.522 | 75.092<br>±2.085 | 66.821<br>±2.249 | 79.505<br>±1.584 | 77.083<br>±1.848 | 80.182<br>±1.74  |
| 157 | 43.093<br>±1.531 | 75.405<br>±2.081 | 67.248<br>±2.252 | 79.721<br>±1.575 | 77.397<br>±1.846 | 80.402<br>±1.736 |
| 158 | 43.298<br>±1.536 | 75.677<br>±2.077 | 67.61<br>±2.246  | 80.074<br>±1.572 | 77.647<br>±1.841 | 80.701<br>±1.728 |
| 159 | 43.577<br>±1.547 | 75.978<br>±2.075 | 68.006<br>±2.245 | 80.381<br>±1.567 | 78.008<br>±1.841 | 80.963<br>±1.72  |
| 160 | 43.759<br>±1.547 | 76.275<br>±2.07  | 68.381<br>±2.238 | 80.635<br>±1.563 | 78.321<br>±1.839 | 81.199<br>±1.709 |
| 161 | 44.126<br>±1.564 | 76.536<br>±2.067 | 68.792<br>±2.238 | 80.778<br>±1.558 | 78.64<br>±1.836  | 81.467<br>±1.699 |
| 162 | 44.339<br>±1.573 | 76.79<br>±2.066  | 69.1<br>±2.234   | 81.005<br>±1.55  | 78.879<br>±1.83  | 81.668<br>±1.689 |
| 163 | 44.618<br>±1.585 | 77.064<br>±2.058 | 69.46<br>±2.232  | 81.198<br>±1.542 | 79.09<br>±1.827  | 81.921<br>±1.682 |
| 164 | 44.861<br>±1.58  | 77.302<br>±2.052 | 69.848<br>±2.229 | 81.463<br>±1.542 | 79.341<br>±1.824 | 82.23<br>±1.674  |
| 165 | 45.117<br>±1.592 | 77.604<br>±2.049 | 70.223<br>±2.228 | 81.689<br>±1.534 | 79.524<br>±1.818 | 82.486<br>±1.668 |
| 166 | 45.34<br>±1.594  | 77.927<br>±2.047 | 70.517<br>±2.233 | 81.872<br>±1.529 | 79.761<br>±1.812 | 82.687<br>±1.662 |
| 167 | 45.637<br>±1.602 | 78.147<br>±2.045 | 70.846<br>±2.235 | 82.105<br>±1.519 | 79.975<br>±1.81  | 82.869<br>±1.659 |

|     |                  |                  |                  |                  |                  |                  |
|-----|------------------|------------------|------------------|------------------|------------------|------------------|
| 168 | 45.839<br>±1.606 | 78.367<br>±2.034 | 71.101<br>±2.228 | 82.266<br>±1.514 | 80.232<br>±1.803 | 83.122<br>±1.648 |
| 169 | 46.13<br>±1.615  | 78.535<br>±2.03  | 71.388<br>±2.226 | 82.422<br>±1.509 | 80.403<br>±1.793 | 83.311<br>±1.643 |
| 170 | 46.392<br>±1.62  | 78.714<br>±2.02  | 71.616<br>±2.217 | 82.67<br>±1.504  | 80.628<br>±1.78  | 83.464<br>±1.634 |
| 171 | 46.758<br>±1.627 | 78.973<br>±2.013 | 71.917<br>±2.217 | 82.903<br>±1.501 | 80.851<br>±1.776 | 83.674<br>±1.628 |
| 172 | 47.062<br>±1.633 | 79.263<br>±2.009 | 72.212<br>±2.219 | 83.144<br>±1.493 | 81.022<br>±1.77  | 83.865<br>±1.624 |
| 173 | 47.274<br>±1.635 | 79.462<br>±2.003 | 72.474<br>±2.21  | 83.341<br>±1.49  | 81.284<br>±1.761 | 84.062<br>±1.614 |
| 174 | 47.588<br>±1.641 | 79.672<br>±1.992 | 72.805<br>±2.207 | 83.516<br>±1.483 | 81.497<br>±1.753 | 84.196<br>±1.613 |
| 175 | 47.877<br>±1.649 | 79.824<br>±1.99  | 73.123<br>±2.211 | 83.746<br>±1.474 | 81.733<br>±1.742 | 84.406<br>±1.605 |
| 176 | 48.177<br>±1.654 | 80.068<br>±1.987 | 73.393<br>±2.201 | 84.048<br>±1.469 | 81.916<br>±1.738 | 84.56<br>±1.599  |
| 177 | 48.479<br>±1.663 | 80.277<br>±1.979 | 73.678<br>±2.189 | 84.261<br>±1.467 | 82.193<br>±1.731 | 84.724<br>±1.594 |
| 178 | 48.766<br>±1.674 | 80.423<br>±1.972 | 73.995<br>±2.185 | 84.484<br>±1.455 | 82.38<br>±1.728  | 84.838<br>±1.589 |
| 179 | 49.032<br>±1.676 | 80.624<br>±1.967 | 74.241<br>±2.188 | 84.665<br>±1.447 | 82.569<br>±1.715 | 85.016<br>±1.585 |
| 180 | 49.264<br>±1.685 | 80.841<br>±1.96  | 74.524<br>±2.19  | 84.932<br>±1.452 | 82.755<br>±1.713 | 85.133<br>±1.576 |
| 181 | 49.422<br>±1.684 | 81.042<br>±1.956 | 74.79<br>±2.192  | 85.088<br>±1.447 | 82.977<br>±1.707 | 85.286<br>±1.563 |
| 182 | 49.623<br>±1.694 | 81.266<br>±1.948 | 75.006<br>±2.19  | 85.259<br>±1.439 | 83.157<br>±1.701 | 85.419<br>±1.555 |
| 183 | 49.963<br>±1.703 | 81.569<br>±1.95  | 75.293<br>±2.179 | 85.446<br>±1.429 | 83.461<br>±1.697 | 85.663<br>±1.548 |
| 184 | 50.159<br>±1.707 | 81.792<br>±1.944 | 75.521<br>±2.167 | 85.585<br>±1.425 | 83.614<br>±1.69  | 85.834<br>±1.543 |
| 185 | 50.507<br>±1.712 | 81.978<br>±1.941 | 75.785<br>±2.159 | 85.74<br>±1.421  | 83.801<br>±1.686 | 86.001<br>±1.542 |
| 186 | 50.765<br>±1.728 | 82.178<br>±1.94  | 76.032<br>±2.155 | 85.859<br>±1.421 | 84.059<br>±1.68  | 86.163<br>±1.537 |
| 187 | 51.009<br>±1.733 | 82.438<br>±1.942 | 76.287<br>±2.147 | 85.968<br>±1.418 | 84.301<br>±1.672 | 86.313<br>±1.534 |
| 188 | 51.263<br>±1.735 | 82.62<br>±1.933  | 76.58<br>±2.141  | 86.081<br>±1.41  | 84.509<br>±1.665 | 86.425<br>±1.531 |
| 189 | 51.608<br>±1.749 | 82.837<br>±1.923 | 76.845<br>±2.136 | 86.231<br>±1.408 | 84.704<br>±1.654 | 86.537<br>±1.52  |

|     |                  |                  |                  |                  |                  |                  |
|-----|------------------|------------------|------------------|------------------|------------------|------------------|
| 190 | 51.868<br>±1.749 | 83.005<br>±1.918 | 77.115<br>±2.134 | 86.347<br>±1.406 | 84.853<br>±1.648 | 86.702<br>±1.516 |
| 191 | 52.143<br>±1.752 | 83.152<br>±1.916 | 77.393<br>±2.131 | 86.489<br>±1.399 | 84.977<br>±1.644 | 86.851<br>±1.51  |
| 192 | 52.479<br>±1.763 | 83.352<br>±1.903 | 77.602<br>±2.128 | 86.624<br>±1.397 | 85.137<br>±1.638 | 87.013<br>±1.497 |
| 193 | 52.681<br>±1.763 | 83.493<br>±1.893 | 77.807<br>±2.123 | 86.78<br>±1.39   | 85.312<br>±1.623 | 87.144<br>±1.49  |
| 194 | 52.969<br>±1.77  | 83.663<br>±1.887 | 77.964<br>±2.118 | 86.909<br>±1.387 | 85.464<br>±1.614 | 87.308<br>±1.483 |
| 195 | 53.323<br>±1.784 | 83.791<br>±1.879 | 78.196<br>±2.108 | 87.062<br>±1.383 | 85.57<br>±1.605  | 87.492<br>±1.476 |
| 196 | 53.589<br>±1.792 | 83.984<br>±1.868 | 78.429<br>±2.098 | 87.174<br>±1.376 | 85.707<br>±1.592 | 87.663<br>±1.466 |
| 197 | 53.825<br>±1.796 | 84.111<br>±1.861 | 78.607<br>±2.089 | 87.32<br>±1.368  | 85.841<br>±1.588 | 87.85<br>±1.459  |
| 198 | 54.096<br>±1.806 | 84.319<br>±1.855 | 78.818<br>±2.08  | 87.534<br>±1.364 | 85.978<br>±1.585 | 87.988<br>±1.447 |
| 199 | 54.362<br>±1.81  | 84.497<br>±1.85  | 79.067<br>±2.074 | 87.69<br>±1.359  | 86.221<br>±1.582 | 88.172<br>±1.44  |
| 200 | 54.532<br>±1.811 | 84.622<br>±1.839 | 79.273<br>±2.072 | 87.881<br>±1.356 | 86.347<br>±1.575 | 88.38<br>±1.434  |

**Supplementary Table S2:** Average Tanimoto similarity of the compounds selected during active learning by random selection (Random), Random Forest (RF), Chemprop (CP), ActiveDelta Chemprop (AD-CP), XGBoost (XGB), and ActiveDelta XGBoost (AD-XGB) during the initial iterations of active learning. Three different fingerprints were used to represent the molecules, Morgan Fingerprints (radius 2, 2048 bits), MACCS Keys, and Atom Pair Fingerprints and the aggregate results are presented. Average and standard deviation are shown for three replicates.

| <i>Iterations</i> | Random          | RF              | CP              | AD-CP           | XGB             | AD-XGB          |
|-------------------|-----------------|-----------------|-----------------|-----------------|-----------------|-----------------|
| 1-15              | 0.218±<br>0.066 | 0.458±<br>0.125 | 0.359±<br>0.116 | 0.225±<br>0.071 | 0.393±<br>0.124 | 0.367±<br>0.124 |
| 16-30             | 0.216±<br>0.065 | 0.438±<br>0.127 | 0.383±<br>0.120 | 0.308±<br>0.105 | 0.393±<br>0.127 | 0.379±<br>0.132 |

|       |                 |                 |                 |                 |                 |                 |
|-------|-----------------|-----------------|-----------------|-----------------|-----------------|-----------------|
| 31-45 | 0.218±<br>0.068 | 0.433±<br>0.133 | 0.389±<br>0.133 | 0.375±<br>0.130 | 0.389±<br>0.132 | 0.371±<br>0.134 |
|-------|-----------------|-----------------|-----------------|-----------------|-----------------|-----------------|

**Supplementary Table S3:** Average Tanimoto similarity of the compound selected from the external test set predicted to be most potent by Random Forest (RF), Chemprop (CP), ActiveDelta Chemprop (AD-CP), XGBoost (XGB), and ActiveDelta XGBoost (AD-XGB) compared to the respective closest compound in the training datasets. Three different fingerprints were used to represent the molecules, Morgan Fingerprint (radius 2, 2048 bits), MACCS Keys, and Atom Pair Fingerprints. “Combined” represents the aggregate results of all datapoints represented by all three fingerprints. Average and standard deviation are shown for three replicates.

| <b><i>Fingerprint</i></b> | <b>RF</b>       | <b>CP</b>       | <b>AD-CP</b>    | <b>XGB</b>      | <b>AD-XGB</b>   |
|---------------------------|-----------------|-----------------|-----------------|-----------------|-----------------|
| Morgan                    | 0.868<br>±0.094 | 0.810<br>±0.144 | 0.794<br>±0.152 | 0.852<br>±0.117 | 0.870<br>±0.107 |
| MACCS Keys                | 0.974<br>±0.039 | 0.956<br>±0.071 | 0.942<br>±0.071 | 0.967<br>±0.039 | 0.973<br>±0.044 |
| Atom Pair                 | 0.858<br>±0.105 | 0.792<br>±0.151 | 0.759<br>±0.184 | 0.850<br>±0.118 | 0.868<br>±0.111 |
| Combined                  | 0.900<br>±0.099 | 0.852<br>±0.147 | 0.831<br>±0.164 | 0.889<br>±0.114 | 0.904<br>±0.105 |
